# Supplementary material for: Biofilms formed by the archaeon Haloferax volcanii exhibit cellular differentiation and social motility, and facilitate horizontal gene transfer
Source: PubMed Central journal article supplement (PMC4180959; doi:10.1186/s12915-014-0065-5), 2014-08-14
Supplement: 12915_2014_65_MOESM1_ESM.pdf [file 12915_2014_65_MOESM1_ESM.pdf]

## Additional file 1: Supplemental figures and tables

Figures S1-S3

Tables S1-S3

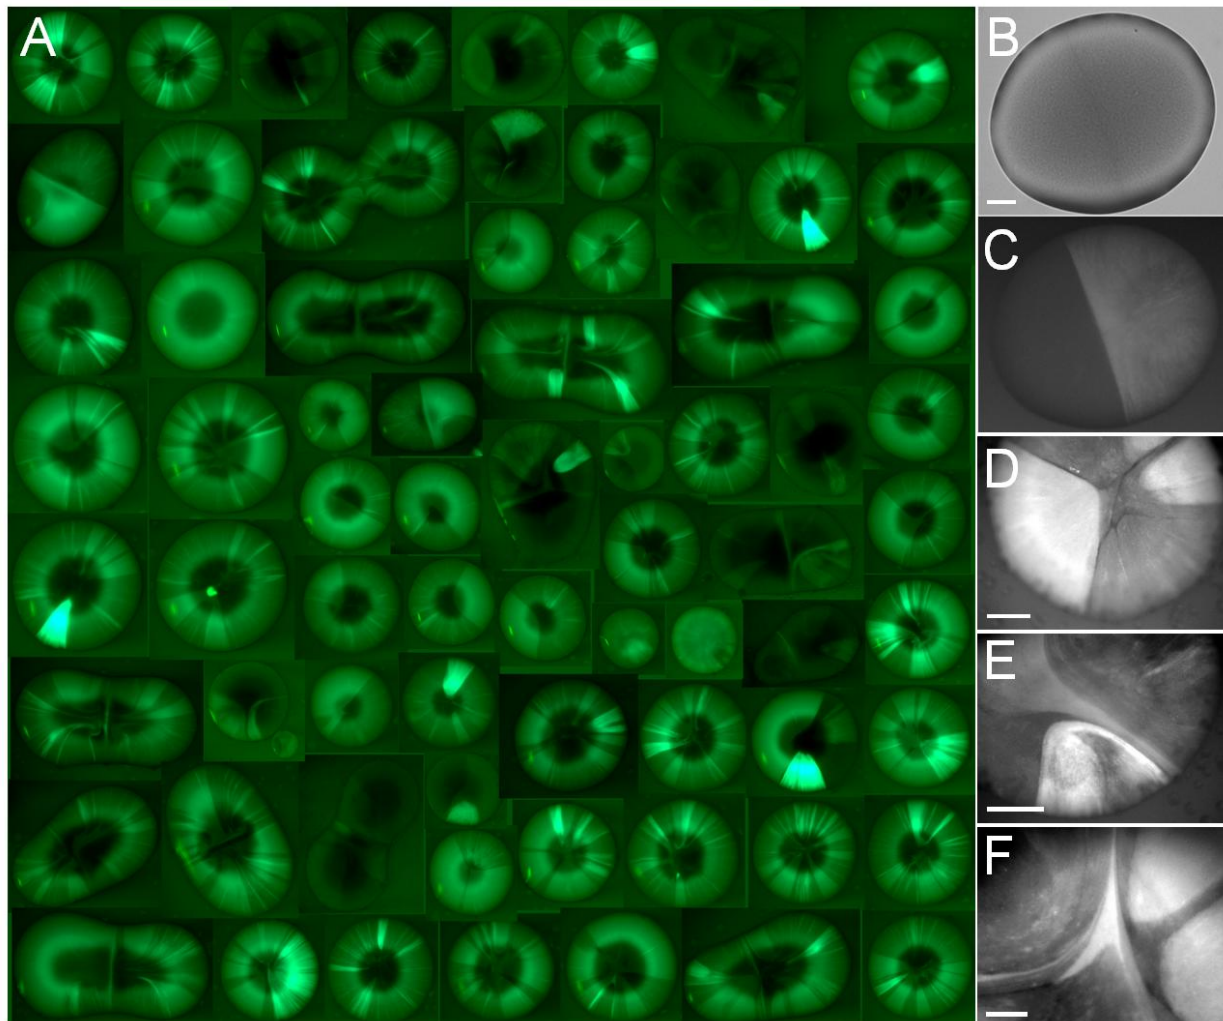

**Figure S1 Colonies formed by *Hfx. volcanii* H1206(pSC409GFP).** Patterns shown were present after repeated subculture. (A) Randomly selected population of seventy-eight colonies on selective medium (Hv-Ca without uracil) imaged with a fluorescence dissecting microscope. (B-F) Colonies like those in (A) imaged at higher magnifications under transmitted light (B) and with blue excitation (C-F). Scale bars for (B-E) equal 100  $\mu$ m and 25  $\mu$ m for (F).

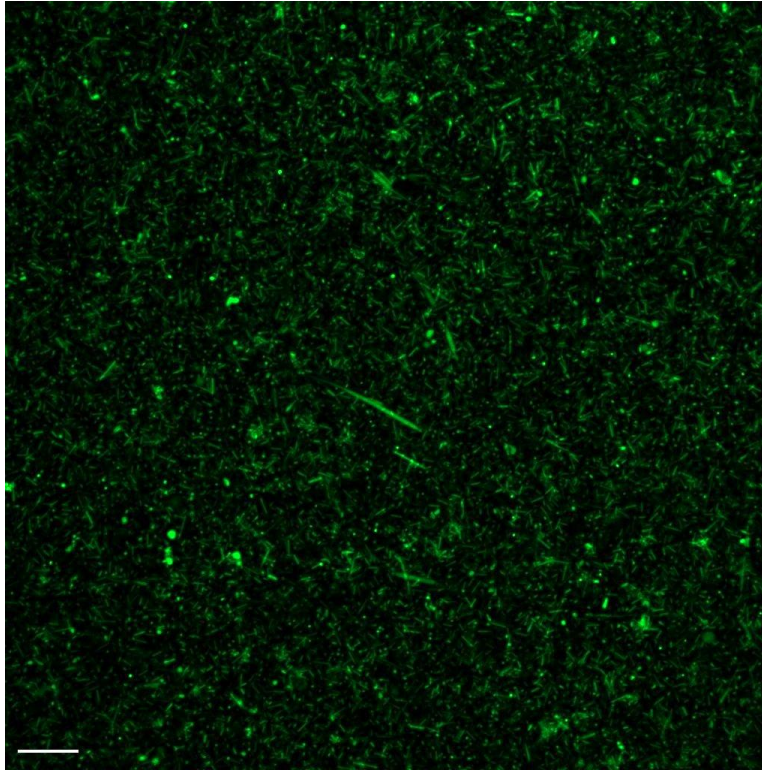

**Figure S2** Projection for a Z-stack of the first 10  $\mu\text{m}$  (or basal-layer) of a replicate 7-day *Hfx. volcanii* H53/H98 mixed SL-biofilm grown in a chamber slide and stained with SYTO 9 (imaged at the time cells were plated for recombination experiment shown in Figure 5). Scale bar equals 20  $\mu\text{m}$ .

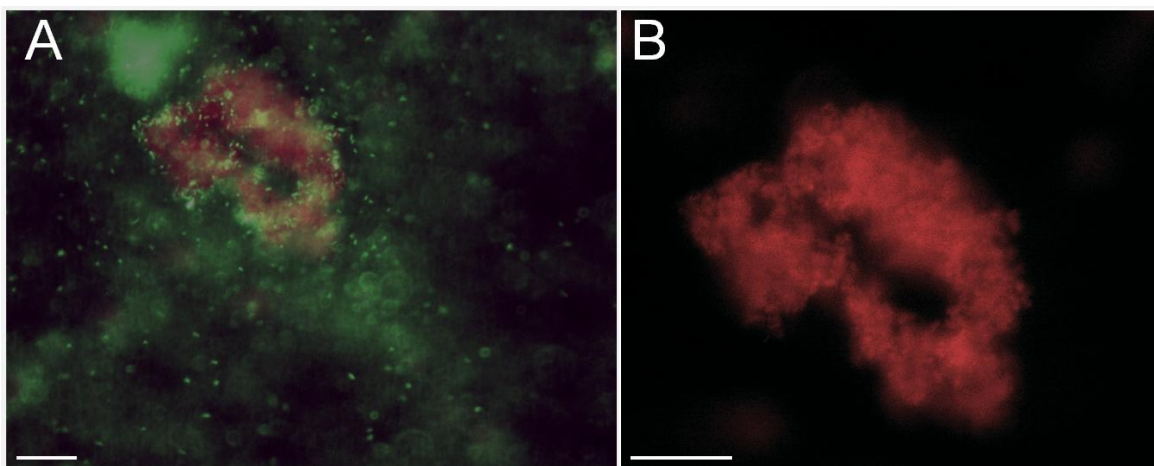

**Figure S3** 7-day *Hfx. volcanii* H1206(pJAM1020) SL-biofilm stained with Congo red. **(A)** Overlay of images taken under blue excitation for GFP signal and green excitation for Congo red fluorescence. **(B)** Higher magnification view from **(A)** of mature cluster displaying Congo red fluorescence. Scale bars equal 20  $\mu\text{m}$ .

**Table S1 Cellular/matrix stains and fluorescent proteins used for biofilm visualization.**

| Stain/fluorescent protein       | Putative target/properties     | Final concentration of staining solution | Excitation/emission (nm) | Method reference/source         |
|---------------------------------|--------------------------------|------------------------------------------|--------------------------|---------------------------------|
| <b>Live cells</b>               |                                |                                          |                          |                                 |
| FM 1-43                         | Cell membrane, lipophilic      | 1 µg/ml                                  | 595/615                  | Molecular Probes, F10317        |
| CellMask Orange (CMO)           | Cell membrane, amphipathic     | 2 µg/ml                                  | 554/567                  | Molecular Probes, C10045        |
| red-shifted GFP                 | constitutive endogenous signal |                                          | 490/509                  | [1]; see Table 1                |
| <b>Dead Cells</b>               |                                |                                          |                          |                                 |
| Propidium Iodide (PI)           | Cellular DNA                   | 30 µM                                    | 535/617                  | [2]; Molecular Probes, D3566    |
| <b>Matrix components</b>        |                                |                                          |                          |                                 |
| DAPI                            | eDNA                           | 5 µg/ml                                  | 350/470                  | [3, 4]; Molecular Probes, D1306 |
| Congo red (CR)                  | amyloid fibrils                | 20 µM                                    | 497/614 <sup>a</sup>     | [5, 6]; Sigma, 573-58-0         |
| Thioflavin T (ThT)              | amyloid fibrils                | 1.5 µM                                   | 450/482 <sup>a</sup>     | [7]; Acros Organics, 211760050  |
| Concanavalin A-Texas Red (ConA) | glycoconjugates                | 20 µg/ml                                 | 595/615                  | [3]; Molecular Probes, C825     |
| <b>SYTO 9</b>                   | cellular DNA and eDNA          | 10 µM                                    | 485/498                  | Molecular Probes, S34854        |

<sup>a</sup> When bound to amyloid fibrils

**Table S2 Strains and Plasmids.**

| Strain or Plasmid    | Relevant properties                                                                                                                       | Reference or source                                  |
|----------------------|-------------------------------------------------------------------------------------------------------------------------------------------|------------------------------------------------------|
| <b>Plasmids</b>      |                                                                                                                                           |                                                      |
| pTA409               | Shuttle vector based on pBluescript II, with <i>pyrE2</i> and <i>hdrB</i> markers and <i>ori-pHV1/4</i> replication origin                | Hölzle et al., 2008                                  |
| pJAM1020             | Amp <sup>R</sup> Nov <sup>R</sup> ; pHV2 replication origin; RSGFP expressed in <i>Hfx. volcanii</i> ; rRNA P2 promoter and T7 terminator | Reuter, et al., 2004                                 |
| pSC409GFP            | pTA409 with 933 bp KpnI/EcoRI In-Fusion fragment containing RSGFP expression construct from pJAM1020                                      | This study                                           |
| <b>Strains</b>       |                                                                                                                                           |                                                      |
| <i>E. coli</i>       |                                                                                                                                           |                                                      |
| HST08                | Stellar competent cloning strain                                                                                                          | Clontech, 636763                                     |
| K12                  | <i>E. coli dam dcm</i> cloning strain                                                                                                     | New England Biolabs, C2925I                          |
| <i>Hfx. volcanii</i> |                                                                                                                                           |                                                      |
| DS2                  | Wild-type                                                                                                                                 | Mullakhanbhai and Larsen, 1975; Hartman et al., 2010 |
| H26                  | $\Delta pyrE2$                                                                                                                            | Allers et al., 2004                                  |
| H53                  | $\Delta pyrE2 \Delta trpA$                                                                                                                | Allers et al., 2004                                  |
| H98                  | $\Delta pyrE2 \Delta hdrB$                                                                                                                | Allers et al., 2004                                  |
| H1206                | $\Delta pyrE2 \Delta mrr$                                                                                                                 | Allers et al., 2010                                  |
| H1206(pJAM1020)      | $\Delta pyrE2 \Delta mrr$ , with pJAM1020; constitutive RSGFP expression; Nov <sup>R</sup>                                                | This study                                           |
| H1206(pSC409GFP)     | $\Delta pyrE2 \Delta mrr$ , with pSC409GFP; constitutive RSGFP expression                                                                 | This study                                           |

**Table S3 Oligonucleotide primers.**

| Primer            | Sequence (5' -3') <sup>a</sup>                                 | Properties                                                                   |
|-------------------|----------------------------------------------------------------|------------------------------------------------------------------------------|
| SC_P2promoter_F   | <u>TATAGGGCGAATTGGGTACCCA</u><br><u>ACCCCGATCCAAGCTTCTAGAG</u> | Forward primer for amplification of RSGFP with P2 promoter and T7 terminator |
| SC_T7terminator_R | <u>CGGGCTGCAGGAATTCTTCA</u><br><u>GCAAAAACCCCTCAAGAC</u>       | Forward primer for amplification of RSGFP with P2 promoter and T7 terminator |

<sup>a</sup> In-Fusion adaptor sites are underlined.

### Supplemental references

1. Reuter CJ, Maupin-Furlow JA: **Analysis of proteasome-dependent proteolysis in *Haloferax volcanii* cells, using short-lived green fluorescent proteins.** *Applied and environmental microbiology* 2004, **70**(12):7530-7538.
2. Leuko S, Legat A, Fendrihan S, Stan-Lotter H: **Evaluation of the LIVE/DEAD BacLight kit for detection of extremophilic archaea and visualization of microorganisms in environmental hypersaline samples.** *Applied and environmental microbiology* 2004, **70**(11):6884-6886.
3. Fröls S, Dyll-Smith M, Pfeifer F: **Biofilm formation by haloarchaea.** *Environmental microbiology* 2012, **14**(12):3159-3174.
4. Jurcisek JA, Bakaletz LO: **Biofilms formed by nontypeable *Haemophilus influenzae* in vivo contain both double-stranded DNA and type IV pilin protein.** *J Bacteriol* 2007, **189**(10):3868-3875.
5. Cegelski L, Pinkner JS, Hammer ND, Cusumano CK, Hung CS, Chorell E, Aberg V, Walker JN, Seed PC, Almqvist F *et al*: **Small-molecule inhibitors target *Escherichia coli* amyloid biogenesis and biofilm formation.** *Nature chemical biology* 2009, **5**(12):913-919.
6. Puchtler H, Waldrop FS, Meloan SN: **A review of light, polarization and fluorescence microscopic methods for amyloid.** *Appl Pathol* 1985, **3**:5-17.
7. Larsen P, Nielsen JL, Dueholm MS, Wetzel R, Otzen D, Nielsen PH: **Amyloid adhesins are abundant in natural biofilms.** *Environmental microbiology* 2007, **9**(12):3077-3090.
